# Supplementary material
Source: publisher site journal article supplement (https://www.dovepress.com/get_supplementary_file.php?f=250969.docx)
Supplement: Supplementary file 1 [file get_supplementary_file.php]

**Supplementary Material 1: Pillsbury grading system**

| **Grade** | **Description** |
| --- | --- |
| Grade1 | Comedones and occasional small cysts confined to the face |
| Grade2 | Comedones with occasional pustules and small cysts confined to the face |
| Grade3 | Many comedones and small and large inflammatory papules and pustules, more extensive but confined to the face |
| Grade4 | Many comedones and deep lesions tending to coalesce and canalize, and involving the face and the upper aspects of the trunk |
